# Supplementary material for: Alkylation of benzene using CO2and H2over ZnZrOx/ZSM-5: the effect of Y doping
Source: Royal Society of Chemistry journal article supplement (doi:10.1039/d2nj05267a), 2022-11-24
Supplement: d2nj05267a1.pdf [file d2nj05267a1.pdf]

## **Alkylation of benzene using CO<sub>2</sub> and H<sub>2</sub> over ZnZrO<sub>x</sub>/ZSM-5: the effect of Y doping**

Guowei Bian<sup>a,b</sup>, Pengyu Niu<sup>a</sup>, Litao Jia<sup>a,c\*</sup>, Heqin Guo<sup>a</sup>, Debao Li<sup>a,c\*</sup>

<sup>a</sup>State Key Laboratory of Coal Conversion, Institute of Coal Chemistry, Chinese

Academy of Sciences, Taiyuan 030001, PR China

<sup>b</sup>University of Chinese Academy of Sciences, Beijing 100039, PR China

<sup>c</sup>Dalian National Laboratory of Clean Energy, Dalian, 116023, PR China

\* Corresponding author. E-mail: [jialitao910@163.com](mailto:jialitao910@163.com) (Litao Jia), [dbli@sxicc.ac.cn](mailto:dbli@sxicc.ac.cn)

(Debao Li).

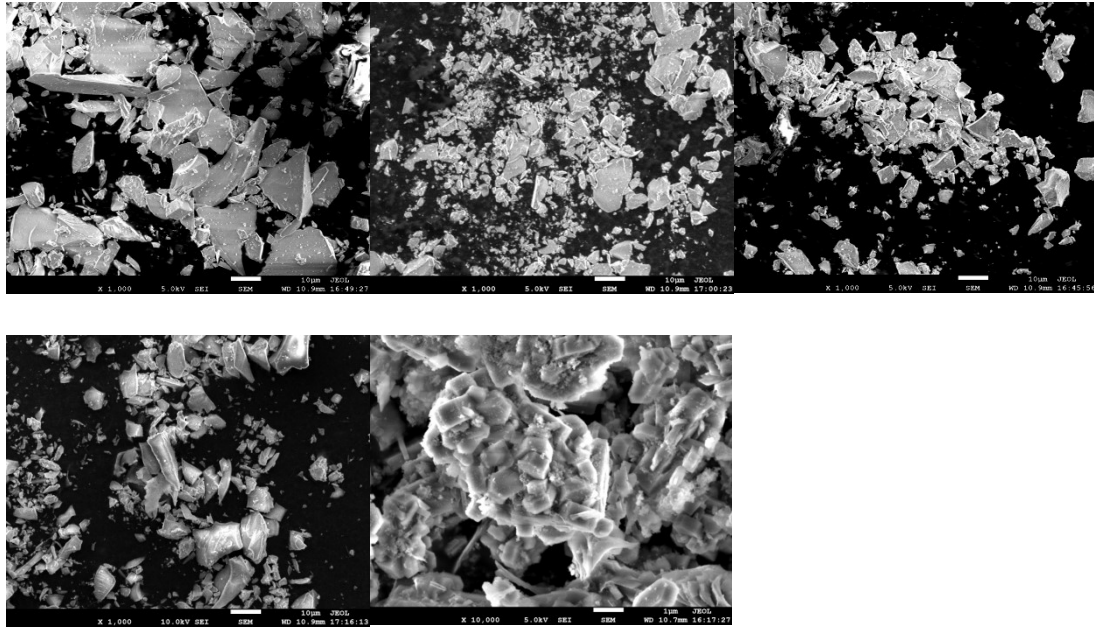

Fig.S1 Y0, Y0.05, Y0.1, Y0.3,ZSM-5 SEM images

Table S1 d-spacings of prepared catalysts calculated using the Bragg equation from XRD

|              | $2\theta / ^\circ$ | d(011)<br>(nm) | $2\theta / ^\circ$ | d(110)<br>(nm) | $2\theta / ^\circ$ | d(020)<br>(nm) | $2\theta / ^\circ$ | d(121)<br>(nm) |
|--------------|--------------------|----------------|--------------------|----------------|--------------------|----------------|--------------------|----------------|
| <b>Y0</b>    | 30.53              | 0.2926         | 35.38              | 0.2535         | 50.83              | 0.1795         | 60.4               | 0.1531         |
| <b>Y0.05</b> | 30.46              | 0.2932         | 35.28              | 0.2542         | 50.78              | 0.1797         | 60.33              | 0.1533         |
| <b>Y0.1</b>  | 30.45              | 0.2933         | 35.27              | 0.2544         | 50.70              | 0.1799         | 60.23              | 0.1535         |
| <b>Y0.3</b>  | 30.41              | 0.2937         | 35.15              | 0.2551         | 50.44              | 0.1808         | 59.94              | 0.1542         |

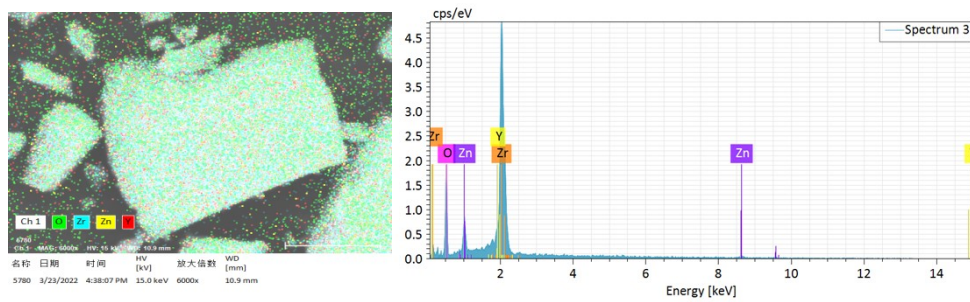

Fig.S2 EDS-mapping of Y0.1

Table S2 EDS-mapping element content analysis of Y0.1.

| Element   | Atomic number | Quality / % | Normalized Mass / % | Atoms / % |
|-----------|---------------|-------------|---------------------|-----------|
| <b>O</b>  | 8             | 24.8        | 29.9                | 70.3      |
| <b>Zn</b> | 30            | 3.6         | 4.3                 | 2.5       |
| <b>Y</b>  | 39            | 3.8         | 4.6                 | 1.9       |
| <b>Zr</b> | 40            | 50.8        | 61.3                | 25.3      |
|           |               | 82.9        | 100                 | 100       |

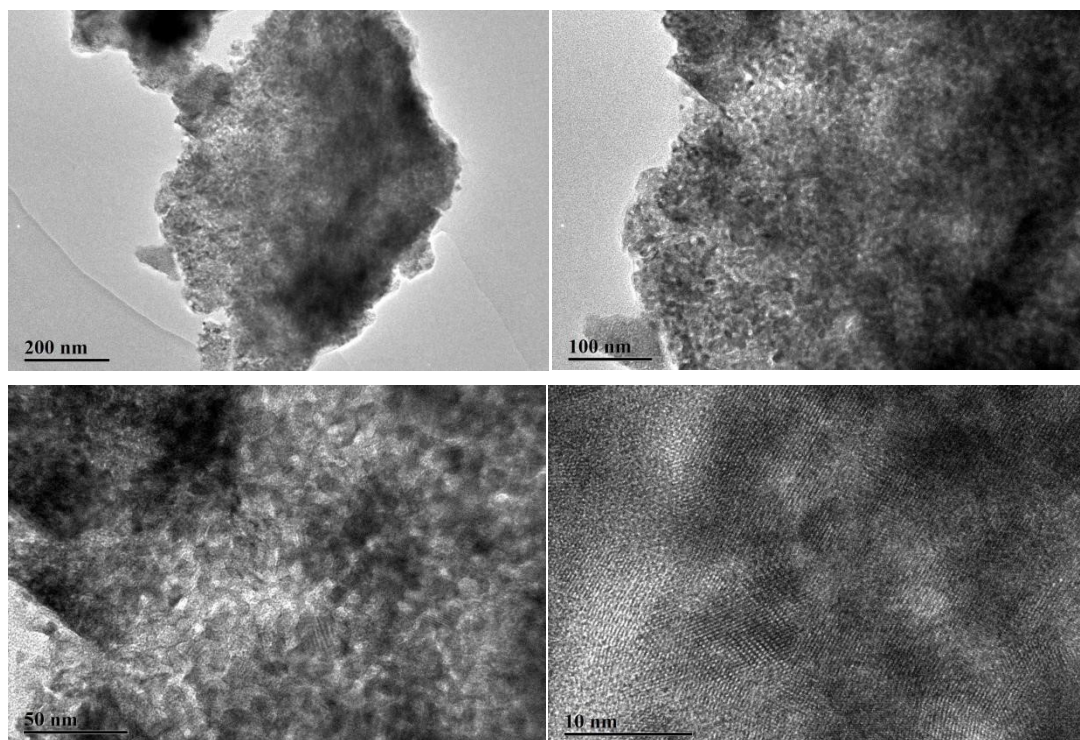

Fig. S3 Y0.1 TEM images of different magnifications

Table S3 Deconvolution results of O 1s XPS peaks.

| Catalyst | O <sub>OH</sub> / % | O <sub>V</sub> / % | O <sub>L</sub> / % |
|----------|---------------------|--------------------|--------------------|
| Y0       | 13.1                | 17.8               | 69.1               |
| Y0.05    | 11.0                | 24.7               | 64.3               |
| Y0.1     | 13.6                | 25.7               | 60.7               |
| Y0.3     | 17.3                | 20.2               | 62.5               |

Table S4 Y-doped ZnZrOx/HZSM-5 catalyzed alkylation of CO<sub>2</sub> and benzene.

| Catalyst    | Conv.<br>CO <sub>2</sub> /% | Conv.<br>benz./% | Selectivity/%  |                |                |       |
|-------------|-----------------------------|------------------|----------------|----------------|----------------|-------|
|             |                             |                  | M <sub>B</sub> | E <sub>B</sub> | X <sub>B</sub> | Other |
| Y0/ZSM-5    | 10.0                        | 19.7             | 73.6           | 3.0            | 14.3           | 9.1   |
| Y0.05/ZSM-5 | 10.2                        | 22.7             | 61.8           | 2.6            | 12.4           | 23.2  |
| Y0.1/ZSM-5  | 17.3                        | 30.8             | 56.5           | 2.5            | 15.0           | 26.0  |
| Y0.3/ZSM-5  | 14.5                        | 18.3             | 73.3           | 3.0            | 11.5           | 12.2  |

Table S5 Liquid phase product distribution

| Catalyst          | Conv.<br>benz. / % | Liquid phase product distribution / % |                |                |                 |         |
|-------------------|--------------------|---------------------------------------|----------------|----------------|-----------------|---------|
|                   |                    | M <sub>B</sub>                        | E <sub>B</sub> | X <sub>B</sub> | C <sub>9+</sub> |         |
| Y0/ZSM-5          | 19.7               | 80.2                                  | 3.3            | 15.5           | 1.0             |         |
| Y0.05/ZSM-5       | 22.7               | 79.8                                  | 3.3            | 16.1           | 0.7             |         |
| Y0.1/ZSM-5        | 30.8               | 74.8                                  | 3.3            | 20.0           | 1.9             |         |
| Y0.3/ZSM-5        | 18.3               | 81.5                                  | 3.3            | 12.8           | 2.3             |         |
| Zn0.1Ti/ZSM-5(30) | 23.8               | 77.4                                  | 2.8            | 16.1           | 3.7             | Ref.[1] |

Table S6 Different mixing methods of Y0.1/HZSM-5 catalyzed alkylation of CO<sub>2</sub> and benzene.

|                       | Conv.<br>CO <sub>2</sub> /% | Conv.<br>benz./% | Selectivity/%  |                |                |       |
|-----------------------|-----------------------------|------------------|----------------|----------------|----------------|-------|
|                       |                             |                  | M <sub>B</sub> | E <sub>B</sub> | X <sub>B</sub> | Other |
| <b>dual-bed</b>       | 12.8                        | 9.33             | 56.8           | 5.9            | 6.2            | 31.1  |
| <b>granule-mixing</b> | 14.8                        | 28.5             | 58.0           | 2.1            | 14.4           | 26.5  |
| <b>powder-mixing</b>  | 17.3                        | 30.8             | 56.5           | 2.5            | 15.1           | 25.9  |

Table S7 Gas phase products of Y0.1/ZSM-5 and Y0.1 for CO<sub>2</sub> hydrogenation to methanol

| Catalyst          | Conv.<br>CO <sub>2</sub> /% | Selectivity/% |          |        |           |         |        |      |
|-------------------|-----------------------------|---------------|----------|--------|-----------|---------|--------|------|
|                   |                             | Methane       | Ethylene | Ethane | Propylene | Propane | Butane | CO   |
| <b>Y0.1/ZSM-5</b> | 17.3                        | 1.4           | 0.1      | 0.2    | 0.3       | 0.3     | 0.3    | 56.3 |
| <b>Y0.1</b>       | 13.5                        | 3.7           | 0        | 0      | 0         | 0       | 0      | 91.8 |

Table S8 H<sub>2</sub> consumption amount of various catalysts.

| Catalysts    | ZnY-O-Zr / mmol/g | ZrO <sub>2</sub> / mmol/g | (ZnY-O-Zr)/(ZnY-O-Zr+ZrO <sub>2</sub> ) |
|--------------|-------------------|---------------------------|-----------------------------------------|
| <b>Y0</b>    | 0.08              | 0.52                      | 0.13                                    |
| <b>Y0.05</b> | 0.18              | 0.58                      | 0.24                                    |
| <b>Y0.1</b>  | 0.24              | 0.34                      | 0.41                                    |
| <b>Y0.3</b>  | 0.11              | 0.54                      | 0.17                                    |

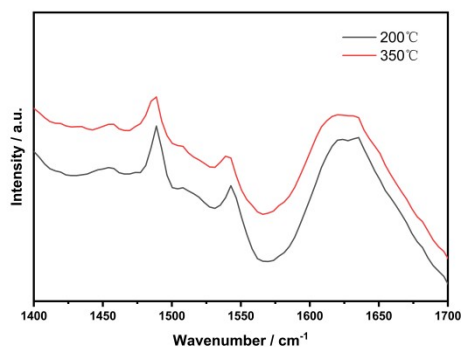

Fig. S4 IR spectra of the ZSM-5 after pyridine desorption

|              | BET Surface Area / m <sup>2</sup> /g | Pore Volume / cm <sup>3</sup> /g | Pore Size / nm |
|--------------|--------------------------------------|----------------------------------|----------------|
| <b>Y0</b>    | 28                                   | 0.03                             | 3              |
| <b>Y0.05</b> | 33                                   | 0.04                             | 3              |
| <b>Y0.1</b>  | 29                                   | 0.04                             | 3              |
| <b>Y0.3</b>  | 14                                   | 0.01                             | 3              |
| <b>ZSM-5</b> | 346                                  | 0.09                             | 6              |

Table S9 Catalyst bet specific surface area, pore volume and pore size

1. Liu, X.; Pan, Y.; Zhang, P.; Wang, Y.; Xu, G.; Su, Z. *Frontiers of Chemical Science and Engineering* **2021**, *16* (3), 384-396.
